# Supplementary material for: Vanadium dioxide–reduced graphene oxide binary host as an efficient polysulfide plague for high-performance lithium–sulfur batteries
Source: Royal Society of Chemistry journal article supplement (doi:10.1039/c8ta10422k), 2018-12-12
Supplement: c8ta10422k1.pdf [file c8ta10422k1.pdf]

# Supporting information

## **Vanadium Dioxide-Reduced Graphene Oxide Binary Host as an Efficient Polysulfide Plague for High Performance Lithium Sulfur Batteries**

Sha Li<sup>1</sup>, Yuan Cen<sup>1</sup>, Qin Xiang, Muhammad Kashif Aslam, Bingbing Hu, Wei Li, Ya Tang, Qi  
Yu, Yuping Liu\* and Changguo Chen\*

*College of Chemistry and Chemical Engineering, Chongqing University, Chongqing  
401331, China.*

Equal Contribution<sup>1</sup>

### **AUTHOR INFORMATION**

#### **Corresponding author:**

**Name:** Changguo Chen

**Tel:** +86 13608357956

**E-mail:** [cgchen@cqu.edu.cn](mailto:cgchen@cqu.edu.cn) (C.G. Chen)

**Name:** Yuping Liu

**Tel:** +86 13594157660

**E-mail:** [liuyuping@cqu.edu.cn](mailto:liuyuping@cqu.edu.cn)

#### **Notes**

The authors declare no competing financial interest.

## Figure captions

**Fig. S1.** EDX spectrum (a), STEM image (b) and corresponding elemental mapping (c-d) of the pure VO<sub>2</sub>.

**Fig. S2.** EDX spectrum (a); SEM image (b) and corresponding elemental mapping (c-f) of the VO<sub>2</sub>@rGO/S composite

**Fig. S3.** Raman spectra of the pure VO<sub>2</sub> (a); XRD patterns of VO<sub>2</sub>@rGO-2 binary host (b), VO<sub>2</sub>@rGO/S composite (c) and TGA curves of VO<sub>2</sub>@rGO/S, rGO/S and S in N<sub>2</sub> atmosphere (d).

**Fig. S4.** UV–vis absorption spectra of Li<sub>2</sub>S<sub>6</sub>/DME&DOL solution with the pure VO<sub>2</sub> and rGO, with the inset showing visualized adsorption of blank Li<sub>2</sub>S<sub>6</sub>/DME&DOL solutions and Li<sub>2</sub>S<sub>6</sub>/DME&DOL solutions with the VO<sub>2</sub> and rGO, respectively.

**Fig. S5.** Cross-sectional SEM image of the VO<sub>2</sub>@rGO/S electrode with different sulfur loading at (a) around 1.5 mg cm<sup>-2</sup> and (b) around 4 mg cm<sup>-2</sup>.

**Fig. S6.** (a) DualScope MP0R thickness gauge of the principles; (b) The standard card; The thickness of the VO<sub>2</sub>@rGO/S electrode with different sulfur loading at (c) around 1.5 mg cm<sup>-2</sup> and (d) around 4 mg cm<sup>-2</sup>.

**Fig. S7.** The comparison of peak potentials (a) and corresponding onset voltages (b) of the VO<sub>2</sub>@rGO/S, rGO/S and VO<sub>2</sub>/S composites; CV profiles of rGO/S (c) and VO<sub>2</sub>/S (d) composites at various scan rates; Cathodic one (e) and two (f) currents of the VO<sub>2</sub>@rGO/S, rGO/S and VO<sub>2</sub>/S composites and their corresponding the square root of scan rates.

**Fig. S8.** Charge-discharge voltage profiles (a) and Cycle performance (b) of the pure VO<sub>2</sub> in the same electrolyte within the voltage window of 1.7-2.8 V for LSBs system.

**Fig. S9.** (a) Comparison of the rate capacities and capacity retentions of the VO<sub>2</sub>@rGO/S, rGO/S and VO<sub>2</sub>/S composites; Galvanostatic charge/discharge profiles of the VO<sub>2</sub>@rGO/S (b), rGO/S (c) and VO<sub>2</sub>/S (d) composites at various rates.

**Fig. S10.** (a) Galvanostatic charge/discharge profiles of the VO<sub>2</sub>@rGO/S composite at at 1 C; (b) CV curves (0.1 mV s<sup>-1</sup>) of the VO<sub>2</sub>@rGO/S and VO<sub>2</sub>@rGO/S-2 composites; (e) Long-term cycling performance and Coulombic efficiency of the

VO<sub>2</sub>@rGO/S-2 at 3 C; (d) EIS Nyquist plots of the VO<sub>2</sub>@rGO/S, rGO/S, VO<sub>2</sub>/S and VO<sub>2</sub>@rGO/S-2 composites before initial discharge, the inset is equivalent circuit of fresh cells; (e) The application of VO<sub>2</sub>@rGO/S electrode, powering 20 light-emitting diodes.

**Fig. S11.** (a) The cycling performance of the VO<sub>2</sub>@rGO/S cathode with 4 mg cm<sup>-2</sup> sulfur loading at a current density of 0.335 mA cm<sup>-2</sup> and 3.35 mA cm<sup>-2</sup>; (b) The corresponding charge-discharge profile on 1<sup>st</sup>, 2<sup>nd</sup>, 10<sup>th</sup>, 20<sup>th</sup> cycle, respectively.

**Fig. S12.** SEM images of VO<sub>2</sub>@rGO/S and rGO/S (a,c) fresh and (b,d) cycled cathode at 1C.

### Table S1

A comparison of electrochemical performance of VO<sub>2</sub>@rGO/S composite between this work and some other cathode materials for LSBs in published literatures.

### Table S2

Electrode Resistance Obtained from the Equivalent Circuit Fitting of the VO<sub>2</sub>@rGO/S, rGO/S, VO<sub>2</sub>/S and VO<sub>2</sub>@rGO/S-2 composites before initial discharge.

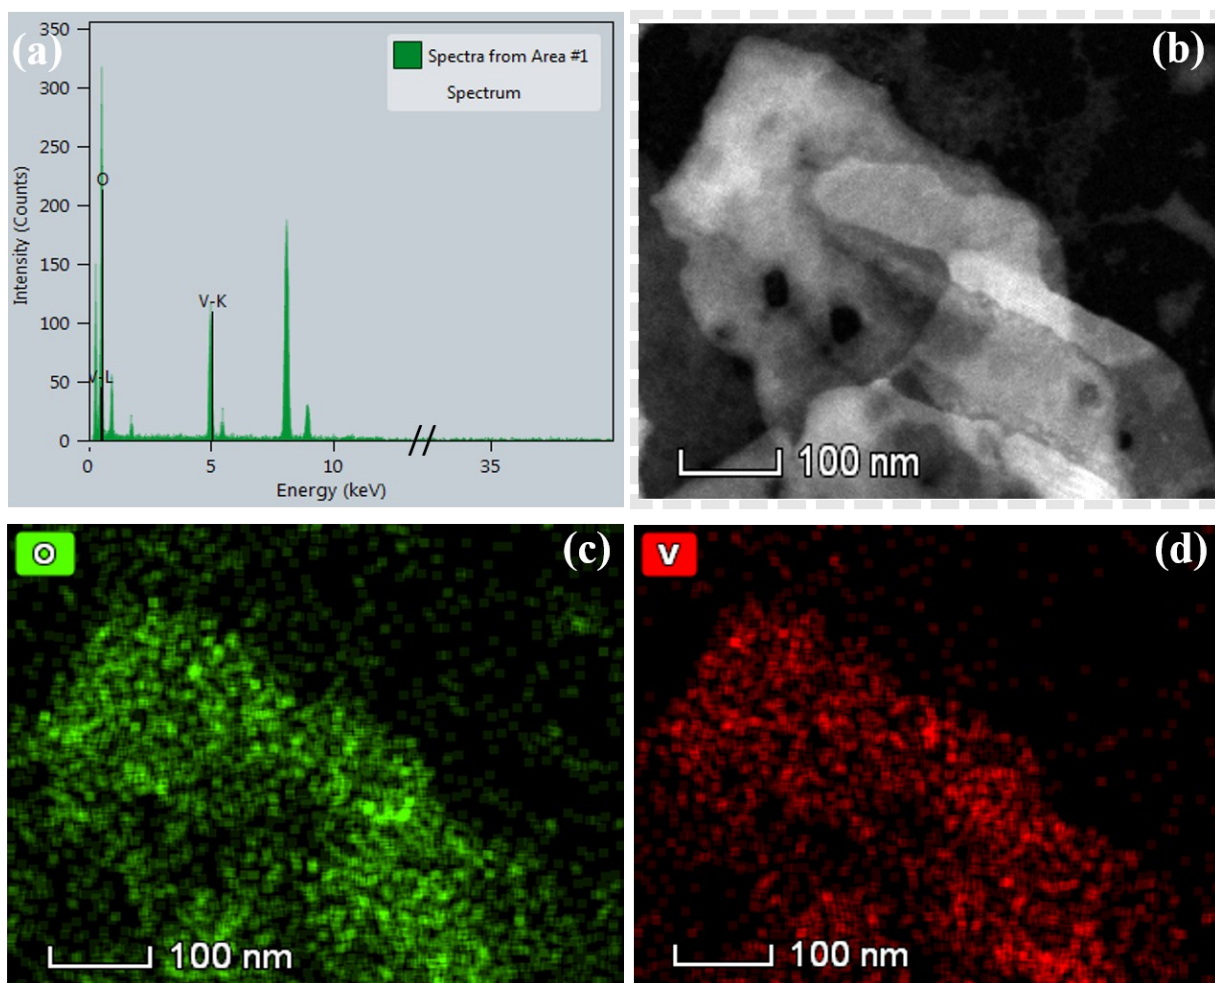

**Fig. S1.** EDX spectrum (a), STEM image (b) and corresponding elemental mapping (c-d) of the pure VO<sub>2</sub>.



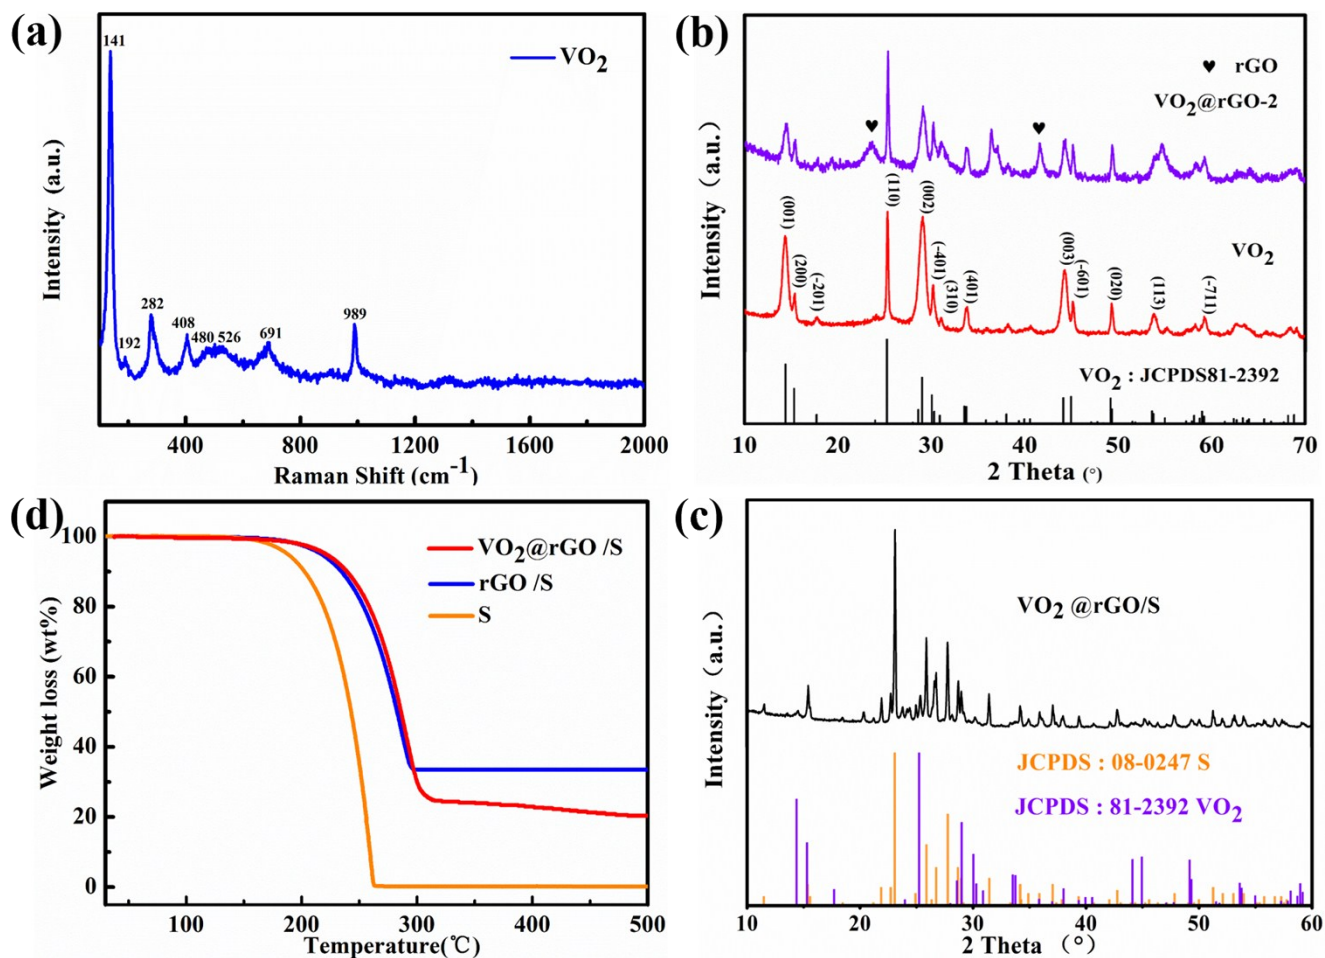

**Fig. S3.** Raman spectra of the pure VO<sub>2</sub> (a); XRD patterns of VO<sub>2</sub>@rGO-2 binary host (b), VO<sub>2</sub>@rGO/S composite (c) and TGA curves of VO<sub>2</sub>@rGO/S, rGO/S and S in N<sub>2</sub> atmosphere (d).

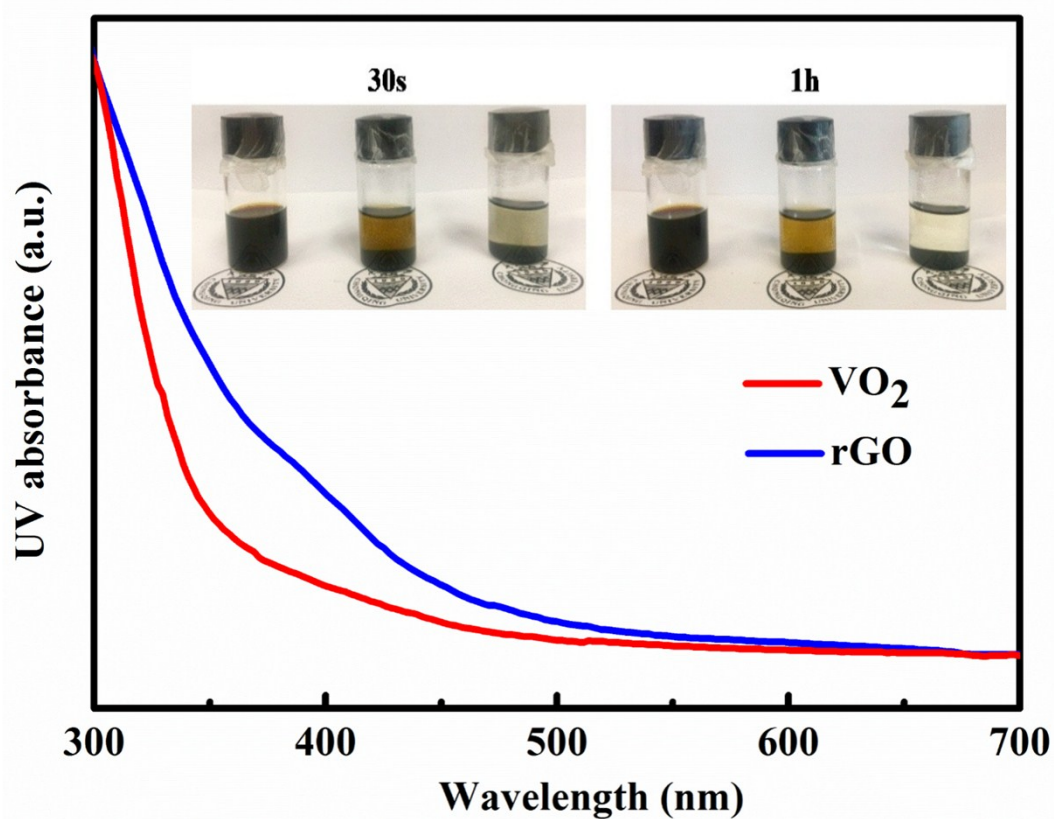

**Fig. S4.** UV-vis absorption spectra of  $\text{Li}_2\text{S}_6/\text{DME}\&\text{DOL}$  solution with the pure  $\text{VO}_2$  and rGO, with the inset showing visualized adsorption of blank  $\text{Li}_2\text{S}_6/\text{DME}\&\text{DOL}$  solutions and  $\text{Li}_2\text{S}_6/\text{DME}\&\text{DOL}$  solutions with the  $\text{VO}_2$  and rGO, respectively.



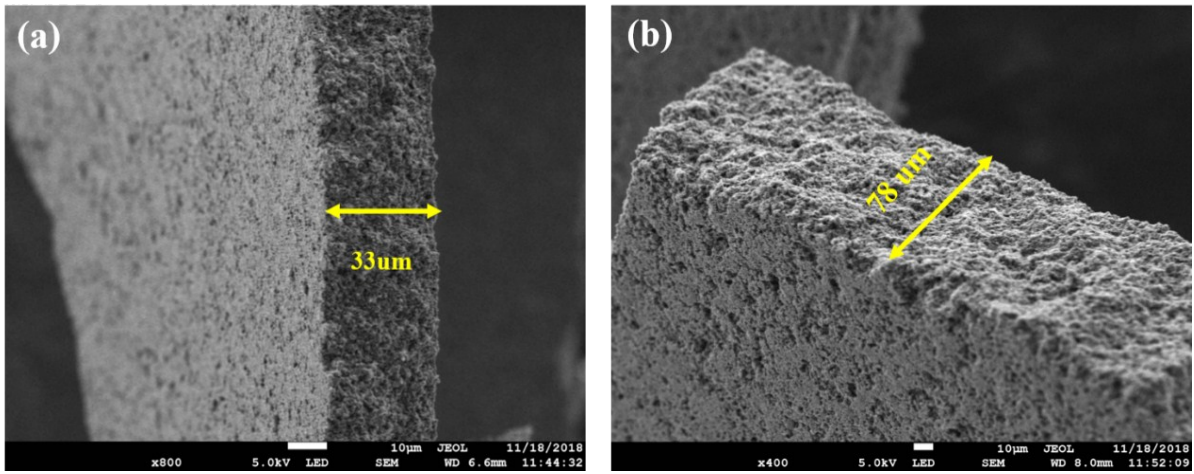

**Fig. S5.** Cross-sectional SEM image of the VO<sub>2</sub>@rGO/S electrode with different sulfur loading at (a) around 1.5 mg cm<sup>-2</sup> and (b) around 4 mg cm<sup>-2</sup>.

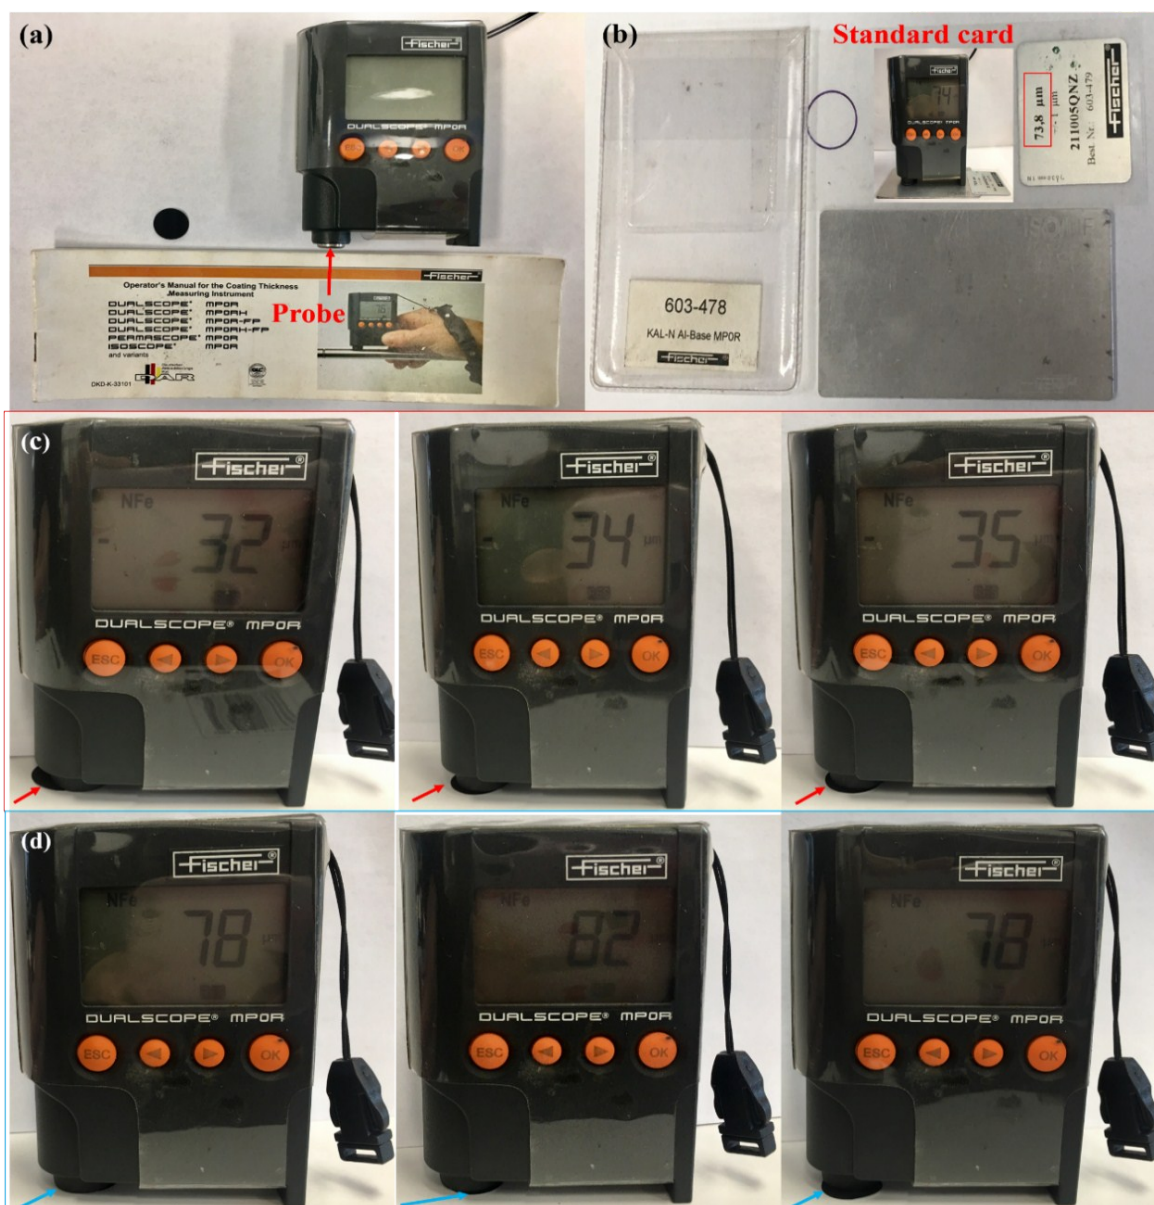

**Fig. S6.** (a) DualScope MPOR thickness gauge of the principles; (b) The standard card; The thickness of the  $\text{VO}_2@\text{rGO}/\text{S}$  electrode with different sulfur loading at (c) around  $1.5 \text{ mg cm}^{-2}$  and (d) around  $4 \text{ mg cm}^{-2}$ .

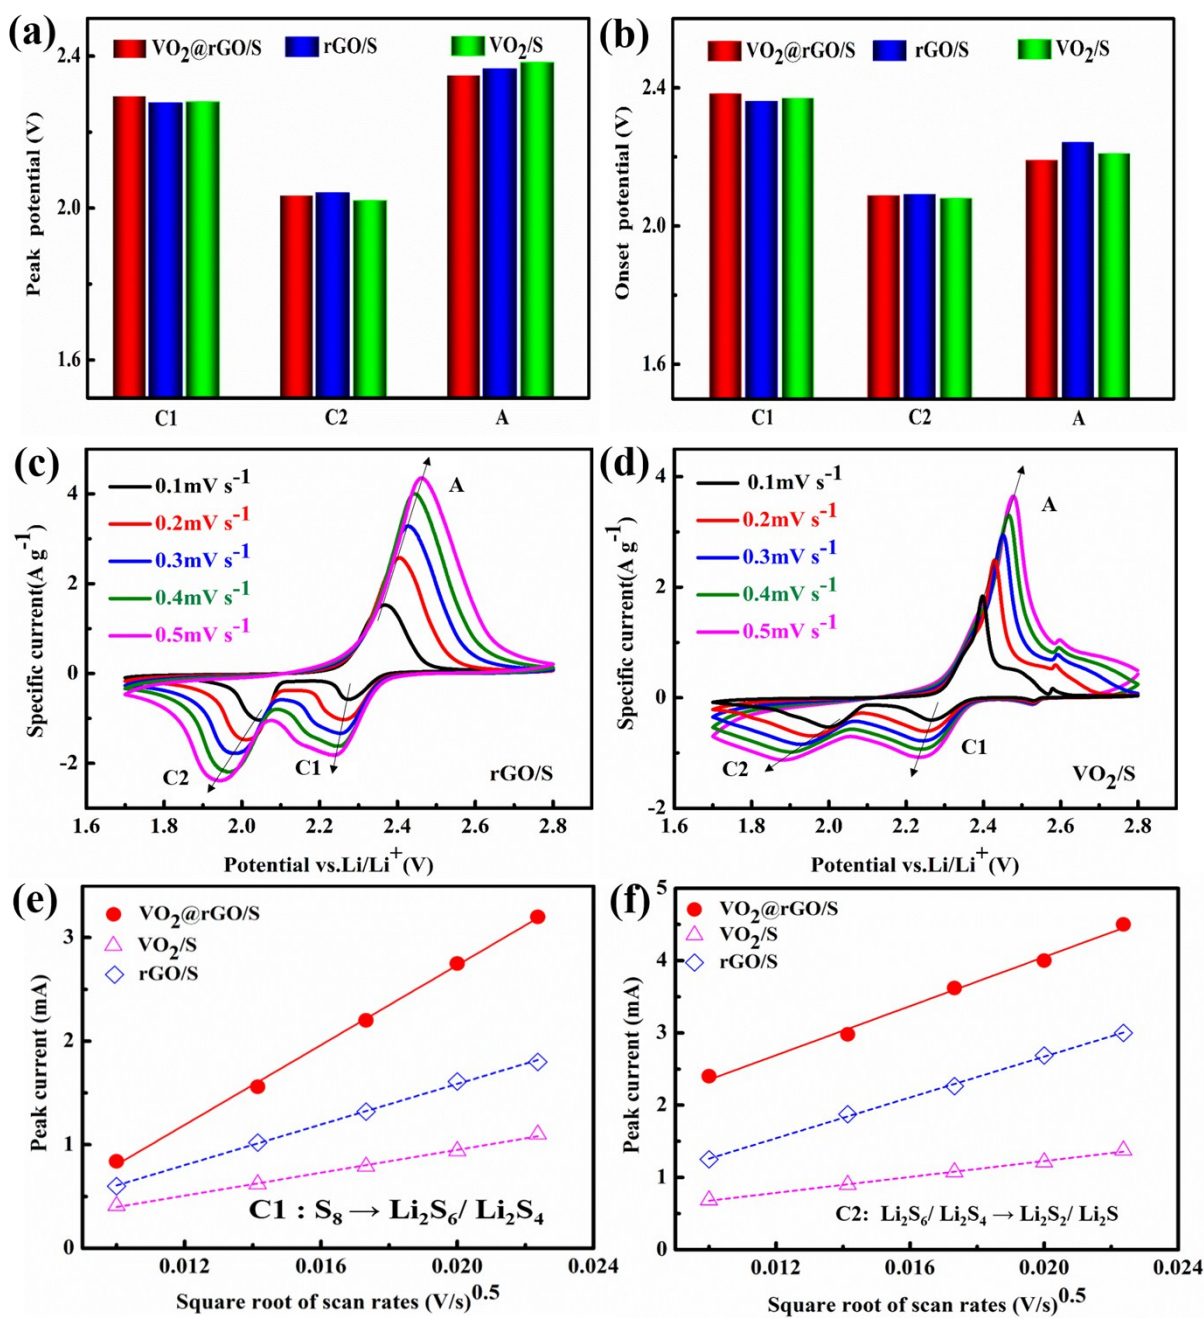

**Fig. S7.** The comparison of peak potentials (a) and corresponding onset voltages (b) of the VO<sub>2</sub>@rGO/S, rGO/S and VO<sub>2</sub>/S composites; CV profiles of rGO/S (c) and VO<sub>2</sub>/S (d) composites at various scan rates; Cathodic one (e) and two (f) currents of the VO<sub>2</sub>@rGO/S, rGO/S and VO<sub>2</sub>/S composites and their corresponding the square root of scan rates.

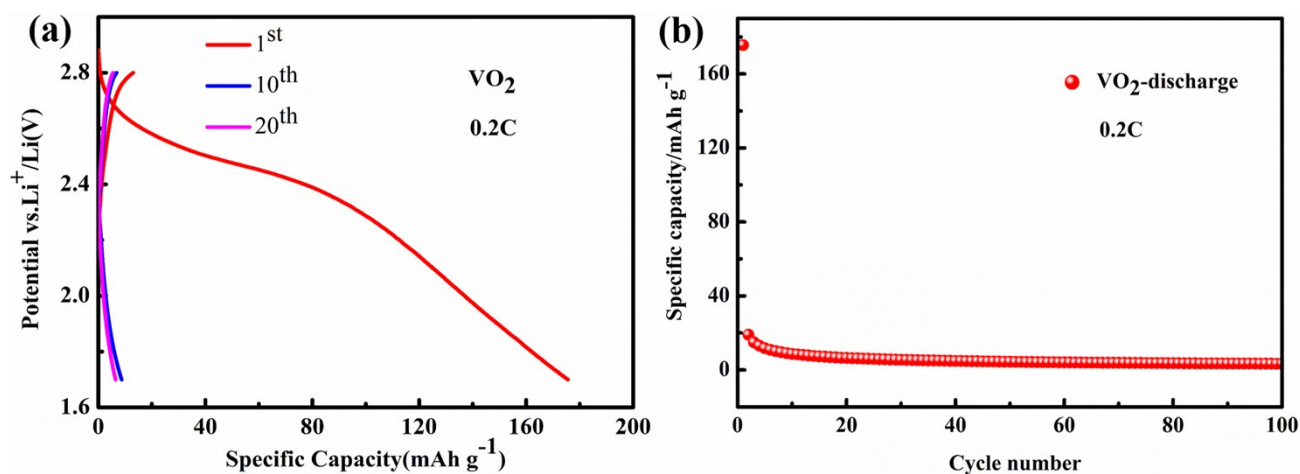

**Fig. S8.** Charge-discharge voltage profiles (a) and Cycle performance (b) of the pure VO<sub>2</sub> in the same electrolyte within the voltage window of 1.7-2.8 V for LSBs system.

As is well known, although the VO<sub>2</sub> with good electrochemical performance used as a lithium storage material was reported in LIBs,<sup>15-18</sup> the electrolytes are the critical role for their corresponding energy storage systems. In LIBs, the electrolyte is ethylene carbonate, not ethers electrolytes, which have been seriously hampered by high working voltage.



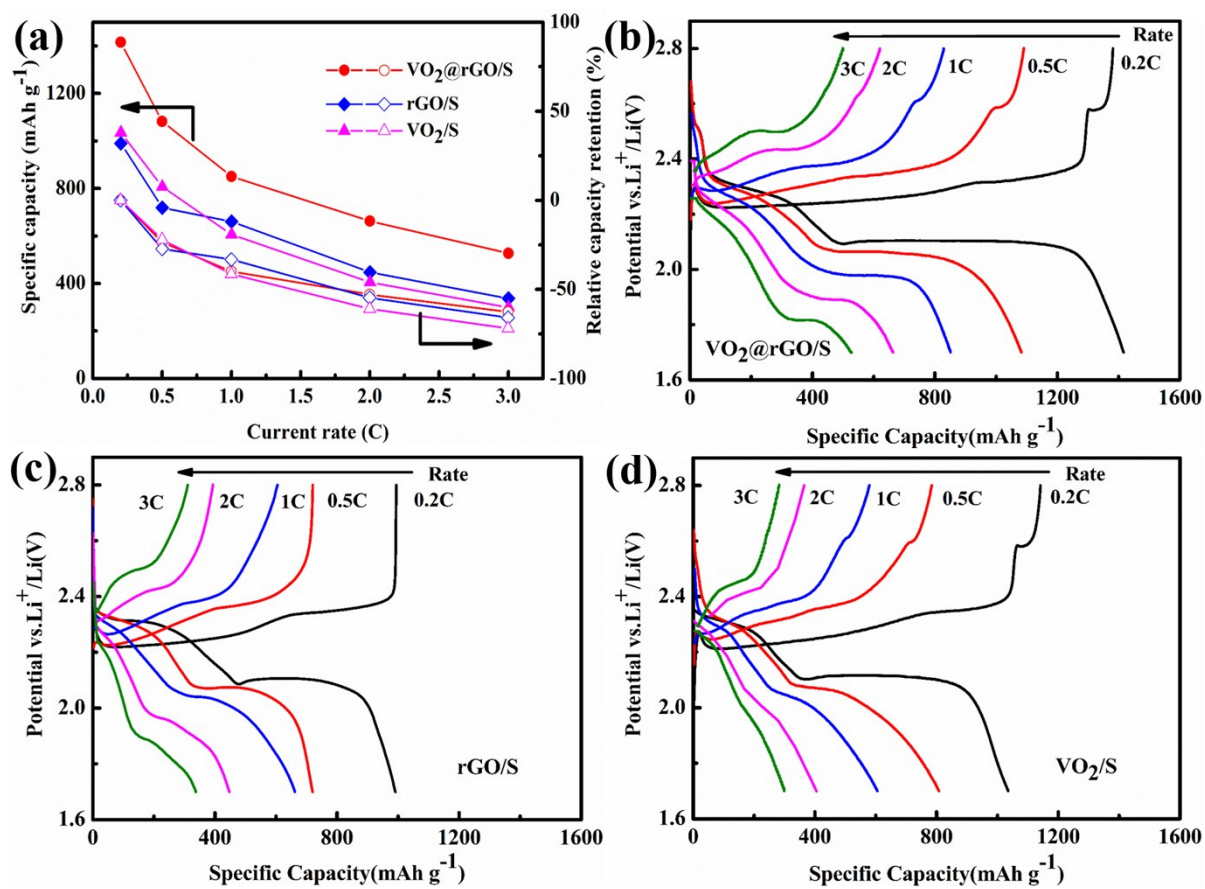

**Fig. S9.** (a) Comparison of the rate capacities and capacity retentions of the VO<sub>2</sub>@rGO/S, rGO/S and VO<sub>2</sub>/S composites; Galvanostatic charge/discharge profiles of the VO<sub>2</sub>@rGO/S (b), rGO/S (c) and VO<sub>2</sub>/S (d) composites at various rates.

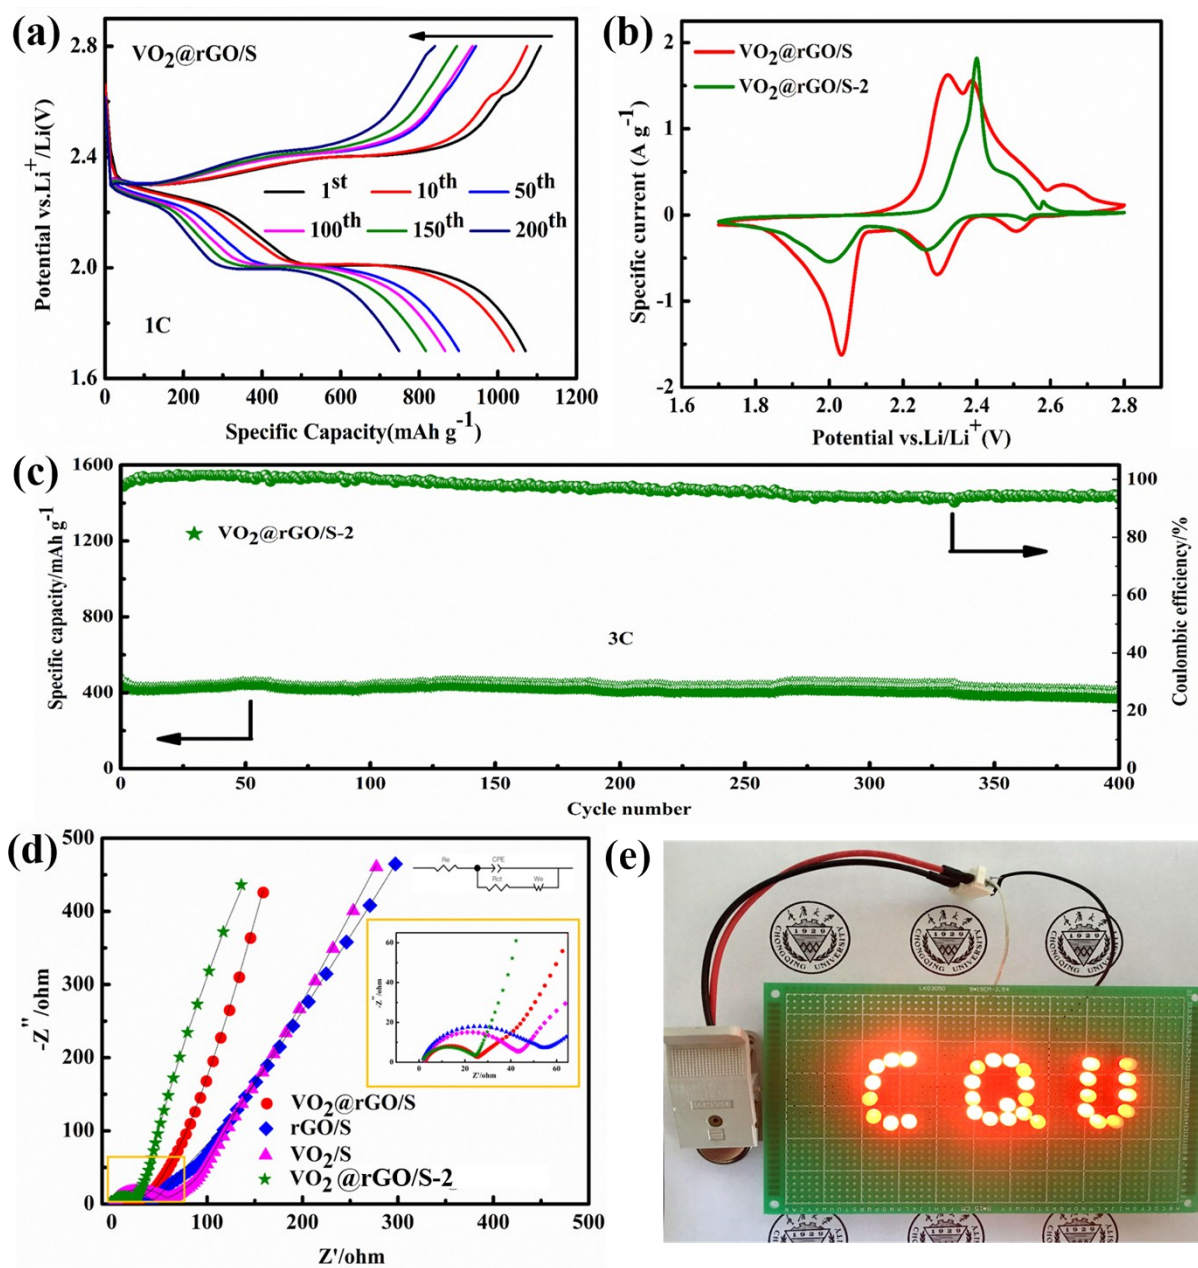

**Fig. S10.** (a) Galvanostatic charge/discharge profiles of the VO<sub>2</sub>@rGO/S composite at 1 C; (b) CV curves (0.1 mV s<sup>-1</sup>) of the VO<sub>2</sub>@rGO/S and VO<sub>2</sub>@rGO/S-2 composites; (c) Long-term cycling performance and Coulombic efficiency of the VO<sub>2</sub>@rGO/S-2 at 3 C; (d) EIS Nyquist plots of the VO<sub>2</sub>@rGO/S, rGO/S, VO<sub>2</sub>/S and

VO<sub>2</sub>@rGO/S-2 composites before initial discharge, the inset is equivalent circuit of fresh cells; (e) The application of VO<sub>2</sub>@rGO/S electrode, powering 20 light-emitting diodes.

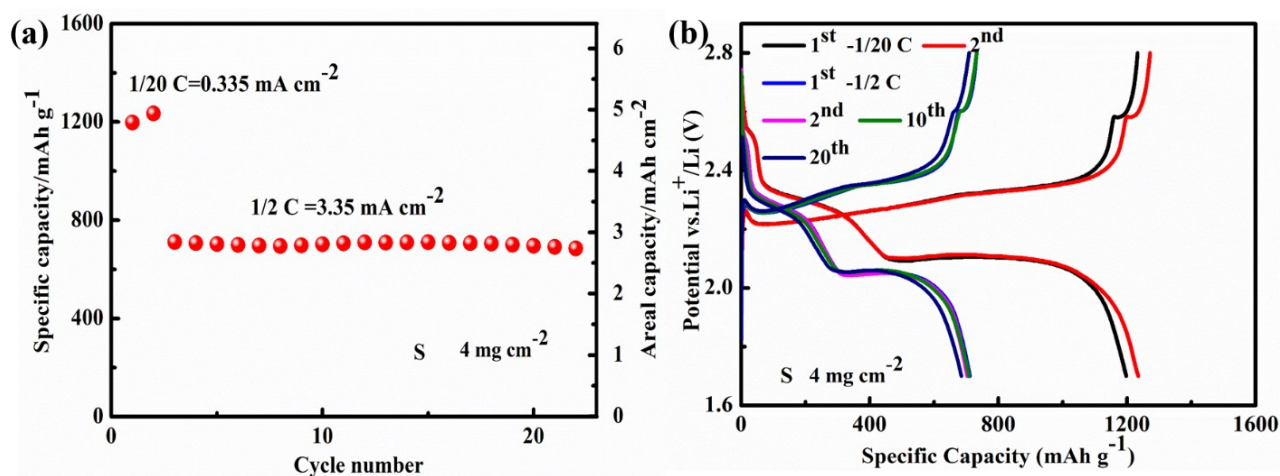

**Fig. S11.** (a) The cycling performance of the VO<sub>2</sub>@rGO/S cathode with 4 mg cm<sup>-2</sup> sulfur loading at a current density of 0.335 mA cm<sup>-2</sup> and 3.35 mA cm<sup>-2</sup>; (b) The corresponding charge-discharge profile on 1<sup>st</sup>, 2<sup>nd</sup>, 10<sup>th</sup>, 20<sup>th</sup> cycle, respectively.



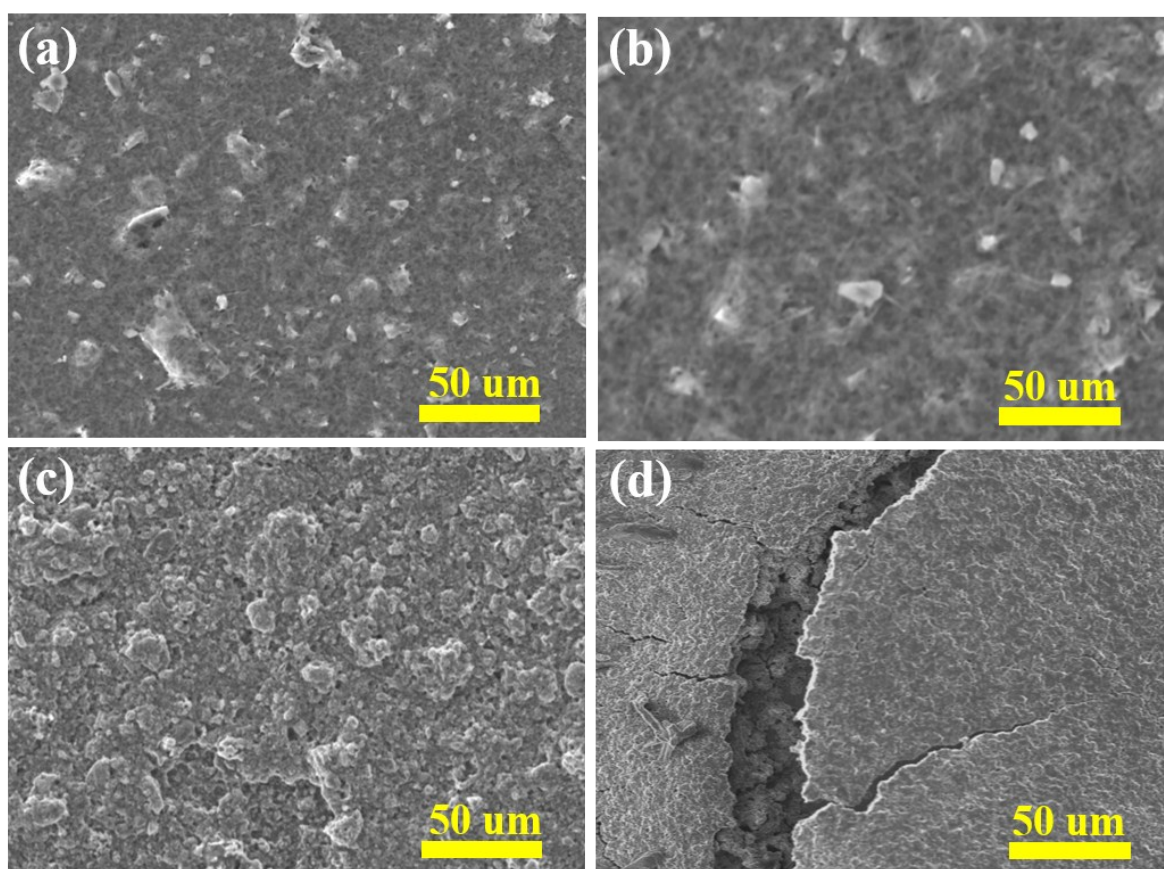

**Fig. S12.** SEM images of VO<sub>2</sub>@rGO/S and rGO/S (a,c) fresh and (b,d) cycled cathode at 1C.

**Table S1**

A comparison of electrochemical performance of VO<sub>2</sub>@rGO/S composite between this work and some other cathode materials for LSBs in published literatures.

| <b>Cathode Materials</b>           | <b>Sulfur Loading (wt%)</b> | <b>Rate (C)</b> | <b>Discharge Capacity (mAh g<sup>-1</sup>)</b> | <b>Capacity after cycling</b> | <b>Ref.</b>      |
|------------------------------------|-----------------------------|-----------------|------------------------------------------------|-------------------------------|------------------|
| VO <sub>2</sub> /G/S               | 70                          | 0.2             | 1405                                           | 990(100 <sup>th</sup> )       | 1                |
| TiO <sub>2</sub> /rGO/S            | 60                          | 0.2             | ~1200                                          | 666(300 <sup>th</sup> )       | 2                |
| S/SnO <sub>2</sub> @C              | 58                          | 200 mA/g        | 1473.1                                         | 764 (100 <sup>th</sup> )      | 3                |
| PPy@MnO <sub>2</sub> @S            | 74.25                       | 0.2             | 1372                                           | 964(200 <sup>th</sup> )       | 4                |
| V <sub>2</sub> O <sub>5</sub> /C/S | ~                           | 0.2             | 1520                                           | 940(50 <sup>th</sup> )        | 5                |
| <b>VO<sub>2</sub>@rGO/S</b>        | <b>76.1</b>                 | <b>0.2</b>      | <b>1358</b>                                    | <b>1049(370<sup>th</sup>)</b> | <b>this work</b> |

**Table S2**

Electrode Resistance Obtained from the Equivalent Circuit Fitting of the VO<sub>2</sub>@rGO/S, rGO/S, VO<sub>2</sub>/S and VO<sub>2</sub>@rGO/S-2 composites before initial discharge.

| <b>Sample</b>            | <b>Re(<math>\Omega</math>)</b> | <b>Rct</b> | <b>We</b> |
|--------------------------|--------------------------------|------------|-----------|
| VO <sub>2</sub> @rGO/S   | 2.7                            | 22.0       | 1065      |
| VO <sub>2</sub> /S       | 0.5                            | 58.9       | 2056      |
| rGO/S                    | 1.9                            | 40.2       | 1937      |
| VO <sub>2</sub> @rGO/S-2 | 0.7                            | 24.4       | 1024      |

## References

1. Y. Song, W. Zhao, X. Zhu, L. Zhang, Q. Li, F. Ding, Z. Liu and J. Sun, *ACS Appl Mater Interfaces*, 2018, **10**, 15733-15741.
2. J. Song, J. Zheng, S. Feng, C. Zhu, S. Fu, W. Zhao, D. Du and Y. Lin, *Carbon*, 2018, **128**, 63-69.
3. Y. Li, B. Shi, W. Liu, R. Guo, H. Pei, D. Ye, J. Xie and J. Kong, *Electrochimica Acta*, 2018, **260**, 912-920.
4. B. Cao, Li, B. Hou, Y. Mo, L. Yin and Y. Chen, *ACS Appl Mater Interfaces*, 2016, **8**, 27795–27802.
5. M.-S. Kim, E. S. Shin, J.-S. Kim, W. I. Cho and S. H. Oh, *Journal of Electroceramics*, 2014, **33**, 142-148.
